# Supplementary material for: Improved Reverse Transcription Loop-Mediated Isothermal Amplification (RT-LAMP) for the Rapid and Sensitive Detection of Yam mosaic virus
Source: MDPI journal article supplement (doi:10.3390/v15071592), 2023-07-21
Supplement: s1 [file s1]

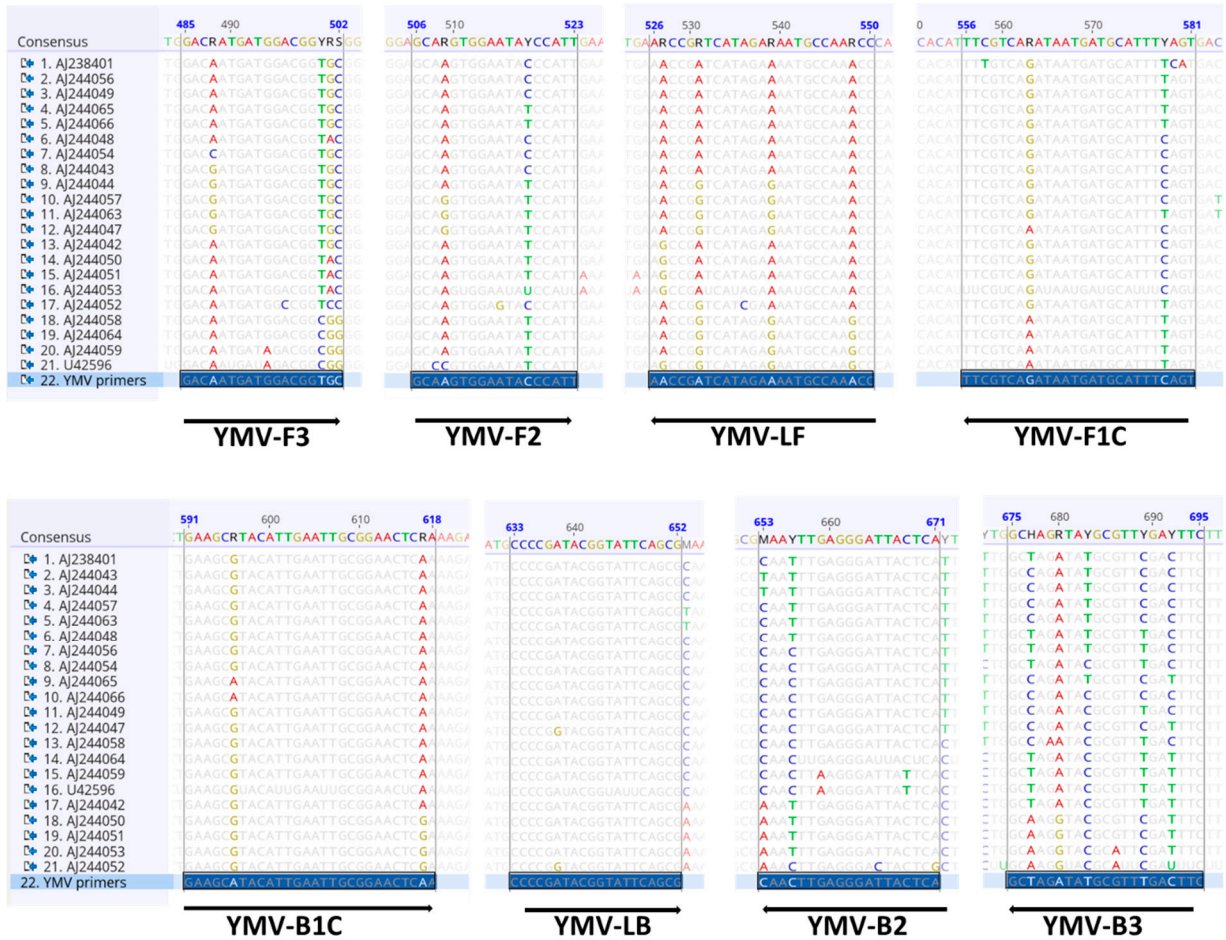

Figure S1: Alignment of YMV coat protein sequences, highlighting the YMV LAMP primers by Nkere et al., [23]
