# Supplementary material for: Improved Reverse Transcription Loop-Mediated Isothermal Amplification (RT-LAMP) for the Rapid and Sensitive Detection of Yam mosaic virus
Source: Viruses. 2023 Jul 21;15(7):1592. doi: 10.3390/v15071592 (PMC10383231; doi:10.3390/v15071592)
Supplement: Supplementary file 1 [file viruses-15-01592-s001.zip › Supplementary Table 1.xlsx]

## Sheet: Supplementary Table 1
Table S1: Percentage identity matrix of sequence alignment used for phylogenetic analysis
	AJ244050	AJ244051	AJ244052	AJ244053	AJ244048	AJ244056	Gh27	Gh30	Nig4	Gh35	Gh32	Gh36	Gh33	Gh17	Gh18	Gh20	Gh23	Gh3	Gh19	Gh15	Cam4	Nig3	Ben1	Nig6	Tog2	AJ244049	Gh29	Gh2	AJ244054	Nig2	Tog1	OL739290	OK239700	OK239701	Cam2	Nig1	Gh28	Gh34	Nig10	Nig5	Nig13	Nig14	Nig11	Nig12	MG711313	Gh5	Gh21	AJ244057	AJ244063
AJ244050		100	99	99.6	92.6	92.8	93	93.2	93.2	93.2	93.4	93.4	93.4	93.4	93.4	93.4	93.4	93.4	93.6	93	93.2	93.2	92.8	92.2	92.8	92.4	92.8	93	92.6	93.2	91.4	91.2	91.4	91.2	91	91	90.8	91	90.8	90.6	90.6	90.6	91	90.2	90.8	90.4	91.2	91	91.4
AJ244051	100		99	99.6	92.6	92.8	93	93.2	93.2	93.2	93.4	93.4	93.4	93.4	93.4	93.4	93.4	93.4	93.6	93	93.2	93.2	92.8	92.2	92.8	92.4	92.8	93	92.6	93.2	91.4	91.2	91.4	91.2	91	91	90.8	91	90.8	90.6	90.6	90.6	91	90.2	90.8	90.4	91.2	91	91.4
AJ244052	99	99		98.6	92.4	92.6	92.8	93	93	93	93.2	93.2	93.2	93.2	93.2	93.2	93.2	93.2	93.4	92.8	93	93	92.6	92	92.6	92.2	92.6	92.8	92.4	93	90.8	91	91.2	91	90.8	90.8	90.6	90.8	90.6	90.4	90.4	90.4	90.8	90	90.6	90.2	91	90.4	90.8
AJ244053	99.6	99.6	98.6		92.6	92.6	92.8	93	93	93	93.2	93.2	93.2	93.2	93.2	93.2	93.2	93.2	93.4	93	93	93	92.6	92	92.6	92.2	92.6	92.8	92.4	93	91.2	91	91.2	91	90.8	90.8	90.6	90.8	90.6	90.4	90.4	90.4	90.8	90	90.6	90.2	91	90.8	91.2
AJ244048	92.6	92.6	92.4	92.6		98.6	98.4	98.2	98.2	98.2	98.4	98.4	98.4	98.4	98.4	98.4	98.4	98.4	98.2	98.8	98.6	98	98.2	98	97.4	97.8	97.8	97.6	97.8	96.2	96	95.2	95	95.2	95.2	95.2	95.8	96	95.8	95.6	95.6	95.6	96	95.2	94.8	95.2	96	95.2	95.6
AJ244056	92.8	92.8	92.6	92.6	98.6		99	98.8	98.8	98.8	99	99	99	99	99	99	99	99	98.8	98.6	98.8	98.6	98.4	98.2	98	98.4	97.6	97.4	98	96.4	96.2	95.4	95.2	95.4	95.8	95.8	96	96.2	96	95.8	95.8	95.8	96.2	95.4	95	95.4	96.2	95.4	95.8
Gh27	93	93	92.8	92.8	98.4	99		99.8	99.8	99.8	99.2	99.2	99.2	99.2	99.2	99.2	99.2	99.2	99	98.4	98.6	98.4	98.6	98	98.2	98.6	97.4	97.6	97.8	96.6	96.8	95.6	95.4	95.6	96	96	96.2	96.4	96.2	96	96	96	96.4	95.6	95.2	95.6	96.4	95.6	96
Gh30	93.2	93.2	93	93	98.2	98.8	99.8		100	99.6	99	99	99	99	99	99	99	99	98.8	98.2	98.4	98.2	98.4	97.8	98	98.4	97.2	97.4	97.6	96.4	96.6	95.4	95.2	95.4	95.8	95.8	96	96.2	96	95.8	95.8	95.8	96.2	95.4	95	95.4	96.2	95.4	95.8
Nig4	93.2	93.2	93	93	98.2	98.8	99.8	100		99.6	99	99	99	99	99	99	99	99	98.8	98.2	98.4	98.2	98.4	97.8	98	98.4	97.2	97.4	97.6	96.4	96.6	95.4	95.2	95.4	95.8	95.8	96	96.2	96	95.8	95.8	95.8	96.2	95.4	95	95.4	96.2	95.4	95.8
Gh35	93.2	93.2	93	93	98.2	98.8	99.8	99.6	99.6		99	99	99	99	99	99	99	99	98.8	98.2	98.4	98.2	98.8	97.8	98	98.4	97.2	97.4	97.6	96.4	96.6	95.4	95.2	95.4	95.8	95.8	96	96.2	96	95.8	95.8	95.8	96.2	95.4	95	95.4	96.2	95.4	95.8
Gh32	93.4	93.4	93.2	93.2	98.4	99	99.2	99	99	99		100	100	100	100	100	100	100	99.8	98.8	98.6	98.8	98.6	98	97.8	98.6	97.8	98	98.2	97	96.6	96.2	96	96.2	96.2	96.2	96.4	96.6	96.4	96.2	96.2	96.2	96.6	95.8	95.4	95.8	96.6	95.8	96.2
Gh36	93.4	93.4	93.2	93.2	98.4	99	99.2	99	99	99	100		100	100	100	100	100	100	99.8	98.8	98.6	98.8	98.6	98	97.8	98.6	97.8	98	98.2	97	96.6	96.2	96	96.2	96.2	96.2	96.4	96.6	96.4	96.2	96.2	96.2	96.6	95.8	95.4	95.8	96.6	95.8	96.2
Gh33	93.4	93.4	93.2	93.2	98.4	99	99.2	99	99	99	100	100		100	100	100	100	100	99.8	98.8	98.6	98.8	98.6	98	97.8	98.6	97.8	98	98.2	97	96.6	96.2	96	96.2	96.2	96.2	96.4	96.6	96.4	96.2	96.2	96.2	96.6	95.8	95.4	95.8	96.6	95.8	96.2
Gh17	93.4	93.4	93.2	93.2	98.4	99	99.2	99	99	99	100	100	100		100	100	100	100	99.8	98.8	98.6	98.8	98.6	98	97.8	98.6	97.8	98	98.2	97	96.6	96.2	96	96.2	96.2	96.2	96.4	96.6	96.4	96.2	96.2	96.2	96.6	95.8	95.4	95.8	96.6	95.8	96.2
Gh18	93.4	93.4	93.2	93.2	98.4	99	99.2	99	99	99	100	100	100	100		100	100	100	99.8	98.8	98.6	98.8	98.6	98	97.8	98.6	97.8	98	98.2	97	96.6	96.2	96	96.2	96.2	96.2	96.4	96.6	96.4	96.2	96.2	96.2	96.6	95.8	95.4	95.8	96.6	95.8	96.2
Gh20	93.4	93.4	93.2	93.2	98.4	99	99.2	99	99	99	100	100	100	100	100		100	100	99.8	98.8	98.6	98.8	98.6	98	97.8	98.6	97.8	98	98.2	97	96.6	96.2	96	96.2	96.2	96.2	96.4	96.6	96.4	96.2	96.2	96.2	96.6	95.8	95.4	95.8	96.6	95.8	96.2
Gh23	93.4	93.4	93.2	93.2	98.4	99	99.2	99	99	99	100	100	100	100	100	100		100	99.8	98.8	98.6	98.8	98.6	98	97.8	98.6	97.8	98	98.2	97	96.6	96.2	96	96.2	96.2	96.2	96.4	96.6	96.4	96.2	96.2	96.2	96.6	95.8	95.4	95.8	96.6	95.8	96.2
Gh3	93.4	93.4	93.2	93.2	98.4	99	99.2	99	99	99	100	100	100	100	100	100	100		99.8	98.8	98.6	98.8	98.6	98	97.8	98.6	97.8	98	98.2	97	96.6	96.2	96	96.2	96.2	96.2	96.4	96.6	96.4	96.2	96.2	96.2	96.6	95.8	95.4	95.8	96.6	95.8	96.2
Gh19	93.6	93.6	93.4	93.4	98.2	98.8	99	98.8	98.8	98.8	99.8	99.8	99.8	99.8	99.8	99.8	99.8	99.8		99	98.8	98.6	98.4	97.8	97.6	98.4	97.6	97.8	98	96.8	96.4	96	95.8	96	96	96	96.6	96.4	96.2	96	96	96	96.4	95.6	95.2	95.6	96.4	95.6	96
Gh15	93	93	92.8	93	98.8	98.6	98.4	98.2	98.2	98.2	98.8	98.8	98.8	98.8	98.8	98.8	98.8	98.8	99		98.6	98.4	97.8	97.6	97.4	97.8	97.8	97.6	98.2	96.6	96	95.6	95.4	95.6	95.2	95.2	96.2	96	95.8	95.6	95.6	95.6	96	95.2	94.8	95.2	96	95.2	95.6
Cam4	93.2	93.2	93	93	98.6	98.8	98.6	98.4	98.4	98.4	98.6	98.6	98.6	98.6	98.6	98.6	98.6	98.6	98.8	98.6		98.2	98.8	98.6	97.6	98	98	97.8	97.6	96	95.8	95.4	95.2	95.4	95.4	95.4	96	95.8	95.6	95.4	95.4	95.4	95.8	95	94.6	95.4	96.2	95	95.4
Nig3	93.2	93.2	93	93	98	98.6	98.4	98.2	98.2	98.2	98.8	98.8	98.8	98.8	98.8	98.8	98.8	98.8	98.6	98.4	98.2		97.8	97.6	97.8	98.2	97.4	97.2	98.2	97	95.6	95.6	95.4	96	95.4	95.4	95.8	96	95.8	95.6	95.6	95.6	96	95.2	94.8	95.2	96.2	95	95.4
Ben1	92.8	92.8	92.6	92.6	98.2	98.4	98.6	98.4	98.4	98.8	98.6	98.6	98.6	98.6	98.6	98.6	98.6	98.6	98.4	97.8	98.8	97.8		98.2	97.2	98	97.2	97.4	97.2	96	95.8	95	94.8	95	95.4	95.4	95.6	95.8	95.6	95.4	95.4	95.4	95.8	95	94.6	95.4	96.2	95	95.4
Nig6	92.2	92.2	92	92	98	98.2	98	97.8	97.8	97.8	98	98	98	98	98	98	98	98	97.8	97.6	98.6	97.6	98.2		99	97.4	98.2	98	97.4	97	96.4	94.8	95	95.2	95.6	95.6	95.8	96	95.8	95.6	95.6	95.6	96	95.2	94.8	95.6	96.4	95.2	95.6
Tog2	92.8	92.8	92.6	92.6	97.4	98	98.2	98	98	98	97.8	97.8	97.8	97.8	97.8	97.8	97.8	97.8	97.6	97.4	97.6	97.8	97.2	99		97.2	97.6	97.4	97.2	97.2	96.2	95	95.2	95.4	95.8	95.8	95.6	96.2	96	95.8	95.8	95.8	96.2	95.4	95	95.4	95.8	95.4	95.8
AJ244049	92.4	92.4	92.2	92.2	97.8	98.4	98.6	98.4	98.4	98.4	98.6	98.6	98.6	98.6	98.6	98.6	98.6	98.6	98.4	97.8	98	98.2	98	97.4	97.2		96.8	97	97.2	96.4	95.8	95.8	95.6	95.8	96	96	96.4	96.6	96.4	96.2	96.2	96.2	96.6	95.8	95.4	95.8	96	95.6	96
Gh29	92.8	92.8	92.6	92.6	97.8	97.6	97.4	97.2	97.2	97.2	97.8	97.8	97.8	97.8	97.8	97.8	97.8	97.8	97.6	97.8	98	97.4	97.2	98.2	97.6	96.8		99.8	97.6	96.4	95.8	95.4	95.6	95.8	95	95	95.6	95.8	95.6	95.4	95.4	95.4	95.8	95	94.6	95	95.8	95	95.4
Gh2	93	93	92.8	92.8	97.6	97.4	97.6	97.4	97.4	97.4	98	98	98	98	98	98	98	98	97.8	97.6	97.8	97.2	97.4	98	97.4	97	99.8		97.4	96.6	96	95.6	95.8	96	95.2	95.2	95.8	96	95.8	95.6	95.6	95.6	96	95.2	94.8	95.2	96	95.2	95.6
AJ244054	92.6	92.6	92.4	92.4	97.8	98	97.8	97.6	97.6	97.6	98.2	98.2	98.2	98.2	98.2	98.2	98.2	98.2	98	98.2	97.6	98.2	97.2	97.4	97.2	97.2	97.6	97.4		96.4	96.2	95.4	95.6	95.4	95.4	95.4	95.6	95.8	95.6	95.4	95.4	95.4	95.8	95	94.6	95	96.2	95	95.4
Nig2	93.2	93.2	93	93	96.2	96.4	96.6	96.4	96.4	96.4	97	97	97	97	97	97	97	97	96.8	96.6	96	97	96	97	97.2	96.4	96.4	96.6	96.4		95.8	95	95.2	95.8	95.2	95.2	95.6	95.8	95.6	95.8	95.8	95.8	96.2	95.4	94.8	95	96	94.8	95.2
Tog1	91.4	91.4	90.8	91.2	96	96.2	96.8	96.6	96.6	96.6	96.6	96.6	96.6	96.6	96.6	96.6	96.6	96.6	96.4	96	95.8	95.6	95.8	96.4	96.2	95.8	95.8	96	96.2	95.8		94.8	95	94.8	95.4	95.4	96	96.2	96	95.8	95.8	95.8	96.2	95.4	95.4	95.4	96.4	96	96
OL739290	91.2	91.2	91	91	95.2	95.4	95.6	95.4	95.4	95.4	96.2	96.2	96.2	96.2	96.2	96.2	96.2	96.2	96	95.6	95.4	95.6	95	94.8	95	95.8	95.4	95.6	95.4	95	94.8		99	98.8	95.8	95.8	96.2	97.2	97	96.8	96.8	96.8	96.8	96.4	96	96.4	95.8	95.8	96.2
OK239700	91.4	91.4	91.2	91.2	95	95.2	95.4	95.2	95.2	95.2	96	96	96	96	96	96	96	96	95.8	95.4	95.2	95.4	94.8	95	95.2	95.6	95.6	95.8	95.6	95.2	95	99		99	96.8	96.8	96.8	97.4	97.6	97.4	97.4	97.4	97	97	96.6	97	96	96	96.4
OK239701	91.2	91.2	91	91	95.2	95.4	95.6	95.4	95.4	95.4	96.2	96.2	96.2	96.2	96.2	96.2	96.2	96.2	96	95.6	95.4	96	95	95.2	95.4	95.8	95.8	96	95.4	95.8	94.8	98.8	99		96.2	96.2	96.2	97.2	97	97.2	97.2	97.2	97.2	96.8	96	96.4	95.8	95.8	96.2
Cam2	91	91	90.8	90.8	95.2	95.8	96	95.8	95.8	95.8	96.2	96.2	96.2	96.2	96.2	96.2	96.2	96.2	96	95.2	95.4	95.4	95.4	95.6	95.8	96	95	95.2	95.4	95.2	95.4	95.8	96.8	96.2		100	98	98.6	98.8	99	99	99	99	98.6	97.8	98.2	96.4	96.6	96.8
Nig1	91	91	90.8	90.8	95.2	95.8	96	95.8	95.8	95.8	96.2	96.2	96.2	96.2	96.2	96.2	96.2	96.2	96	95.2	95.4	95.4	95.4	95.6	95.8	96	95	95.2	95.4	95.2	95.4	95.8	96.8	96.2	100		98	98.6	98.8	99	99	99	99	98.6	97.8	98.2	96.4	96.6	96.8
Gh28	90.8	90.8	90.6	90.6	95.8	96	96.2	96	96	96	96.4	96.4	96.4	96.4	96.4	96.4	96.4	96.4	96.6	96.2	96	95.8	95.6	95.8	95.6	96.4	95.6	95.8	95.6	95.6	96	96.2	96.8	96.2	98	98		99	99.2	99	99	99	98.6	98.6	98.2	98.2	96.4	96.2	96.4
Gh34	91	91	90.8	90.8	96	96.2	96.4	96.2	96.2	96.2	96.6	96.6	96.6	96.6	96.6	96.6	96.6	96.6	96.4	96	95.8	96	95.8	96	96.2	96.6	95.8	96	95.8	95.8	96.2	97.2	97.4	97.2	98.6	98.6	99		99.8	99.6	99.6	99.6	99.6	99.2	98.8	98.8	97	97.2	97.4
Nig10	90.8	90.8	90.6	90.6	95.8	96	96.2	96	96	96	96.4	96.4	96.4	96.4	96.4	96.4	96.4	96.4	96.2	95.8	95.6	95.8	95.6	95.8	96	96.4	95.6	95.8	95.6	95.6	96	97	97.6	97	98.8	98.8	99.2	99.8		99.8	99.8	99.8	99.4	99.4	99	99	96.8	97	97.2
Nig5	90.6	90.6	90.4	90.4	95.6	95.8	96	95.8	95.8	95.8	96.2	96.2	96.2	96.2	96.2	96.2	96.2	96.2	96	95.6	95.4	95.6	95.4	95.6	95.8	96.2	95.4	95.6	95.4	95.8	95.8	96.8	97.4	97.2	99	99	99	99.6	99.8		100	100	99.6	99.6	98.8	98.8	96.6	96.8	97
Nig13	90.6	90.6	90.4	90.4	95.6	95.8	96	95.8	95.8	95.8	96.2	96.2	96.2	96.2	96.2	96.2	96.2	96.2	96	95.6	95.4	95.6	95.4	95.6	95.8	96.2	95.4	95.6	95.4	95.8	95.8	96.8	97.4	97.2	99	99	99	99.6	99.8	100		100	99.6	99.6	98.8	98.8	96.6	96.8	97
Nig14	90.6	90.6	90.4	90.4	95.6	95.8	96	95.8	95.8	95.8	96.2	96.2	96.2	96.2	96.2	96.2	96.2	96.2	96	95.6	95.4	95.6	95.4	95.6	95.8	96.2	95.4	95.6	95.4	95.8	95.8	96.8	97.4	97.2	99	99	99	99.6	99.8	100	100		99.6	99.6	98.8	98.8	96.6	96.8	97
Nig11	91	91	90.8	90.8	96	96.2	96.4	96.2	96.2	96.2	96.6	96.6	96.6	96.6	96.6	96.6	96.6	96.6	96.4	96	95.8	96	95.8	96	96.2	96.6	95.8	96	95.8	96.2	96.2	96.8	97	97.2	99	99	98.6	99.6	99.4	99.6	99.6	99.6		99.2	98.4	98.8	97	97.2	97.4
Nig12	90.2	90.2	90	90	95.2	95.4	95.6	95.4	95.4	95.4	95.8	95.8	95.8	95.8	95.8	95.8	95.8	95.8	95.6	95.2	95	95.2	95	95.2	95.4	95.8	95	95.2	95	95.4	95.4	96.4	97	96.8	98.6	98.6	98.6	99.2	99.4	99.6	99.6	99.6	99.2		98.4	98.4	96.2	96.4	96.6
MG711313	90.8	90.8	90.6	90.6	94.8	95	95.2	95	95	95	95.4	95.4	95.4	95.4	95.4	95.4	95.4	95.4	95.2	94.8	94.6	94.8	94.6	94.8	95	95.4	94.6	94.8	94.6	94.8	95.4	96	96.6	96	97.8	97.8	98.2	98.8	99	98.8	98.8	98.8	98.4	98.4		98	95.8	96	96.2
Gh5	90.4	90.4	90.2	90.2	95.2	95.4	95.6	95.4	95.4	95.4	95.8	95.8	95.8	95.8	95.8	95.8	95.8	95.8	95.6	95.2	95.4	95.2	95.4	95.6	95.4	95.8	95	95.2	95	95	95.4	96.4	97	96.4	98.2	98.2	98.2	98.8	99	98.8	98.8	98.8	98.8	98.4	98		96.6	96.4	96.6
Gh21	91.2	91.2	91	91	96	96.2	96.4	96.2	96.2	96.2	96.6	96.6	96.6	96.6	96.6	96.6	96.6	96.6	96.4	96	96.2	96.2	96.2	96.4	95.8	96	95.8	96	96.2	96	96.4	95.8	96	95.8	96.4	96.4	96.4	97	96.8	96.6	96.6	96.6	97	96.2	95.8	96.6		96.4	96.8
AJ244057	91	91	90.4	90.8	95.2	95.4	95.6	95.4	95.4	95.4	95.8	95.8	95.8	95.8	95.8	95.8	95.8	95.8	95.6	95.2	95	95	95	95.2	95.4	95.6	95	95.2	95	94.8	96	95.8	96	95.8	96.6	96.6	96.2	97.2	97	96.8	96.8	96.8	97.2	96.4	96	96.4	96.4		99.6
AJ244063	91.4	91.4	90.8	91.2	95.6	95.8	96	95.8	95.8	95.8	96.2	96.2	96.2	96.2	96.2	96.2	96.2	96.2	96	95.6	95.4	95.4	95.4	95.6	95.8	96	95.4	95.6	95.4	95.2	96	96.2	96.4	96.2	96.8	96.8	96.4	97.4	97.2	97	97	97	97.4	96.6	96.2	96.6	96.8	99.6
AJ244044	91.4	91.4	90.8	91.2	95.6	95.2	95.4	95.2	95.2	95.2	95.6	95.6	95.6	95.6	95.6	95.6	95.6	95.6	95.4	95	94.8	94.8	94.8	95	95.2	95.4	94.8	95	94.8	94.6	95.4	95.6	95.8	95.6	96.2	96.2	95.8	96.8	96.6	96.4	96.4	96.4	96.8	96	95.6	96	96.2	99	99.4
AJ244043	91.2	91.2	90.6	91	95.2	95	95.2	95	95	95	95.4	95.4	95.4	95.4	95.4	95.4	95.4	95.4	95.2	94.8	94.6	94.6	94.6	94.8	95	95.2	94.6	94.8	94.6	94.4	95.2	95.4	95.6	95.4	96	96	95.6	96.6	96.4	96.2	96.2	96.2	96.6	95.8	95.4	95.8	96	98.8	99.2
Cam3	90.6	90.6	90.4	90.6	95.4	95.6	96.2	96	96	96	96	96	96	96	96	96	96	96	95.8	95.4	95.6	95	95.6	96.2	96.4	95.2	94.8	95	95.2	95.2	95.4	95	95.2	95	95.4	95.4	94.8	95.8	95.6	95.4	95.4	95.4	95.8	95	94.6	95.4	96.2	95	95.4
AJ244062	90.6	90.6	90.4	90.4	94.8	95	95.6	95.4	95.4	95.4	95.8	95.8	95.8	95.8	95.8	95.8	95.8	95.8	95.6	95.2	95	95.4	95.2	94.8	95.4	94.8	94.6	94.8	94.6	95.2	94.8	95	95.2	95.4	95.2	95.2	94.8	95.4	95.2	95.4	95.4	95.4	95.8	95	94.6	95	95.6	94.8	95.2
AJ244061	90.4	90.4	90.2	90.2	95	95.2	95.8	95.6	95.6	95.6	95.6	95.6	95.6	95.6	95.6	95.6	95.6	95.6	95.4	95	94.8	95.2	95	94.6	95.6	95	94.4	94.6	94.8	95	95	94.8	95	95.2	95.4	95.4	95	95.6	95.4	95.6	95.6	95.6	96	95.2	94.8	94.8	95.4	95.4	95.8
AJ244045	91	91	90.8	90.8	95.2	95.4	96	95.8	95.8	96.2	95.8	95.8	95.8	95.8	95.8	95.8	95.8	95.8	95.6	95.2	95	95.4	95.6	94.8	95.8	95.2	94.6	94.8	94.6	95.2	95.2	95	95.2	95.4	95.6	95.6	95.2	95.8	95.6	95.8	95.8	95.8	96.2	95.4	95	95	95.6	95.2	95.6
AJ244065	91.8	91.8	91.6	91.8	95.4	95.2	95.6	95.4	95.4	95.4	95.6	95.6	95.6	95.6	95.6	95.6	95.6	95.6	95.4	95	95.2	95.4	94.8	95	95.4	95.2	94.8	95	94.8	95	95	95	95.2	95	94.8	94.8	94.8	95.4	95.2	95	95	95	95.4	94.6	94.2	94.6	95.2	94.8	95.2
AJ244055	90.8	90.8	90.2	90.6	94.4	95	95.4	95.2	95.2	95.2	95.4	95.4	95.4	95.4	95.4	95.4	95.4	95.4	95.2	94.8	95	95.2	95.2	95.2	95.2	95	94.2	94.4	94.2	94.8	95.2	94.4	94.6	94.4	94.6	94.6	94.6	95.2	95	94.8	94.8	94.8	95.2	94.4	94.4	94.8	95.4	94.2	94.6
AJ244046	91	91	90.4	90.8	94.6	95.2	95.6	95.4	95.4	95.4	95.6	95.6	95.6	95.6	95.6	95.6	95.6	95.6	95.4	95	95.2	95.4	95.2	95.4	95.4	95.2	94.4	94.6	94.4	95	95.4	94.6	94.8	94.6	94.8	94.8	94.8	95.4	95.2	95	95	95	95.4	94.6	94.6	95	95.6	94.4	94.8
AJ244066	91.4	91.4	91.2	91.4	96	95.6	96	95.8	95.8	95.8	96	96	96	96	96	96	96	96	95.8	95.4	95.8	95.4	95.4	95.6	95.8	95.2	95.4	95.6	94.8	95	95.6	95	95.2	95	95.2	95.2	95	95.6	95.4	95.2	95.2	95.2	95.6	94.8	94.4	94.8	95.4	94.8	95
AJ244047	90.4	90.4	90.2	90.2	94.6	94.8	95	94.8	94.8	94.8	95.6	95.6	95.6	95.6	95.6	95.6	95.6	95.6	95.4	95	94.4	95	94.4	94.6	94.8	95.6	95.2	95.4	94.8	94.8	94.8	95.8	96	95.8	96	96	96	97	96.8	96.6	96.6	96.6	97	96.2	96.2	96.2	95.2	95.8	96
AJ244058	90	90	89.8	89.8	91.8	92	92.6	92.4	92.4	92.8	92.8	92.8	92.8	92.8	92.8	92.8	92.8	92.8	92.6	92.2	91.6	93.2	92	92.2	92.6	92	92	92.2	92.4	93.8	93	91.6	91.8	92.8	91.8	91.8	91.8	92.4	92.2	92.4	92.4	92.4	92.8	92.4	91.4	92	92.6	91.6	91.8
AJ244064	90.2	90.2	90	90	92	92.2	92.8	92.6	92.6	93	93	93	93	93	93	93	93	93	92.8	92.4	91.8	93.4	92.2	92.4	92.8	92.2	92.2	92.4	92.6	94	93.2	91.8	92	93	92	92	92	92.6	92.4	92.6	92.6	92.6	93	92.6	91.6	92.2	92.8	91.8	92
AJ244059	90.4	90.4	90.2	90.2	93	93.2	93.8	93.6	93.6	94	94	94	94	94	94	94	94	94	93.8	93.4	92.8	94	93.2	93	93.4	93.2	93.6	93.8	93.6	94.2	93.4	92.8	93	93.6	93	93	93	93.6	93.4	93.6	93.6	93.6	94	93.2	92.6	93.2	93.8	92.8	93
NC004752	89.2	89.2	89	89	91.4	91.6	92.2	92	92	92.4	92.4	92.4	92.4	92.4	92.4	92.4	92.4	92.4	92.2	91.8	91.2	92.4	91.6	91.8	92.2	91.6	92	92.2	92	93	92.2	91.2	91.4	92	91.4	91.4	91.4	92	91.8	92	92	92	92.4	91.6	91	91.6	92.2	91.2	91.4
AJ244042	92.2	92.2	91.6	91.8	91.6	91.4	91.2	91.4	91.4	91.4	91.2	91.2	91.2	91.2	91.2	91.2	91.2	91.2	91	90.8	91.4	91.2	91	91.6	91.8	91.4	91.4	91.2	90.6	91.6	91.4	89.8	90.4	90.6	90.4	90.4	90.6	90.4	90.6	90.8	90.8	90.8	90.4	90.8	91	89.6	89.2	89.8	90
AB126177	16.9	16.9	17.1	16.9	16.9	16.9	16.9	16.9	16.9	16.9	16.9	16.9	16.9	16.9	16.9	16.9	16.9	16.9	16.9	16.7	16.9	16.9	16.9	17.1	17.1	16.9	16.9	16.9	17.1	16.9	17.3	17.1	17.3	17.1	17.1	17.1	17.1	17.1	17.1	17.1	17.1	17.1	16.9	16.9	17.3	16.9	17.1	16.9	16.9
[truncated: 17 more columns]
